# Supplementary material for: A Specific Prebiotic Mixture Added to Starting Infant Formula Has Long-Lasting Bifidogenic Effects
Source: PubMed Central journal article supplement — J Nutr. 2011 May 25;141(7):1335–9. doi: 10.3945/jn.110.136747 (PMC3113290; doi:10.3945/jn.110.136747), 2011-05-25
Supplement: supp_jn.110.136747_nut_136747_T1.pdf [file supp_jn.110.136747_nut_136747_T1.pdf]

**Online Supporting Material**

**Supplemental Table 1: Leucocyte populations in infants that received prebiotic or control formula from birth to 6 mo of age<sup>1</sup>.**

| <b>Age</b> | <b>Leucocyte population</b> | <b>Prebiotic group<br/>(<math>n \times 10^3/\text{mm}^3</math>)</b> | <b>Control group<br/>(<math>n \times 10^3/\text{mm}^3</math>)</b> | <b><i>P</i></b> |
|------------|-----------------------------|---------------------------------------------------------------------|-------------------------------------------------------------------|-----------------|
| Birth      | T-lymphocytes,              | 13.75 ± 6.08                                                        | 14.74 ± 4.81                                                      | 0.59            |
|            | CD3+                        | 4.62 ± 1.75                                                         | 4.23 ± 1.52                                                       | 0.79            |
|            | CD4+                        | 3.26 ± 1.46                                                         | 2.82 ± 0.99                                                       | 0.57            |
|            | CD8+                        | 0.98 ± 0.50                                                         | 0.85 ± 0.25                                                       | 0.79            |
|            | B-lymphocytes               | 5.94 ± 2.25                                                         | 5.53 ± 2.01                                                       | 0.70            |
|            | Natural Killer Cells        | 0.41 ± 0.23                                                         | 0.43 ± 0.38                                                       | 0.67            |
|            | Monocytes                   | 2.25 ± 1.86                                                         | 1.83 ± 1.10                                                       | 0.73            |
|            | Neutrophils                 | 4.16 ± 4.48                                                         | 6.70 ± 3.65                                                       | 0.09            |
| 3 mo       | T-lymphocytes               | 10.83 ± 4.87                                                        | 10.68 ± 4.89                                                      | 0.76            |
|            | CD3+                        | 4.25 ± 1.23                                                         | 4.41 ± 1.61                                                       | 0.62            |
|            | CD4+                        | 3.05 ± 0.87                                                         | 2.93 ± 1.23                                                       | 0.52            |
|            | CD8+                        | 0.83 ± 0.31                                                         | 0.85 ± 0.44                                                       | 0.91            |
|            | B-lymphocytes               | 6.56 ± 2.17                                                         | 6.59 ± 2.29                                                       | 0.82            |
|            | Natural Killer Cells        | 0.57 ± 0.34                                                         | 0.60 ± 0.34                                                       | 0.79            |
|            | Monocytes                   | 0.87 ± 0.46                                                         | 0.91 ± 0.38                                                       | 0.59            |
|            | Neutrophils                 | 3.14 ± 2.62                                                         | 2.87 ± 2.93                                                       | 0.82            |
| 6 mo       | T-lymphocytes               | 10.25 ± 1.90                                                        | 10.06 ± 3.12                                                      | 0.59            |
|            | CD3+                        | 4.04 ± 1.47                                                         | 4.54 ± 1.22                                                       | 0.38            |
|            | CD4+                        | 2.92 ± 1.16                                                         | 2.87 ± 1.13                                                       | 0.99            |

|       |                      |              |             |      |
|-------|----------------------|--------------|-------------|------|
|       | CD8+                 | 0.90 ± 0.35  | 0.91 ± 0.27 | 0.52 |
|       | B-lymphocytes        | 6.14 ± 1.74  | 6.44 ± 1.92 | 0.94 |
|       | Natural Killer Cells | 0.36 ± 0.19  | 0.52 ± 0.25 | 0.18 |
|       | Monocytes            | 0.63 ± 0.22  | 0.80 ± 0.43 | 0.52 |
|       | Neutrophils          | 3.18 ± 0.81  | 2.45 ± 1.63 | 0.19 |
| 12 mo | T-lymphocytes        | 10.48 ± 2.12 | 9.42 ± 1.80 | 0.47 |
|       | CD3+                 | 4.73 ± 1.24  | 3.30 ± 1.03 | 0.02 |
|       | CD4+                 | 3.22 ± 1.11  | 2.29 ± 0.74 | 0.12 |
|       | CD8+                 | 1.16 ± 0.57  | 0.79 ± 0.28 | 0.07 |
|       | B-lymphocytes        | 6.52 ± 2.27  | 4.81 ± 1.23 | 0.10 |
|       | Natural Killer Cells | 0.68 ± 0.40  | 0.50 ± 0.21 | 0.18 |
|       | Monocytes            | 0.77 ± 0.19  | 0.64 ± 0.31 | 0.38 |
|       | Neutrophils          | 2.45 ± 0.60  | 3.61 ± 1.73 | 0.13 |

<sup>1</sup>Data are mean ± SD, *n*=10
